# Supplementary material for: Are Food Animals Responsible for Transfer of Antimicrobial-Resistant Escherichia coli or Their Resistance Determinants to Human Populations? A Systematic Review
Source: PubMed Central journal article supplement (PMC6103250; doi:10.1089/fpd.2017.2411), 2018-08-01
Supplement: Supp_Data.pdf [file Supp_Data.pdf]

## Supplementary Data

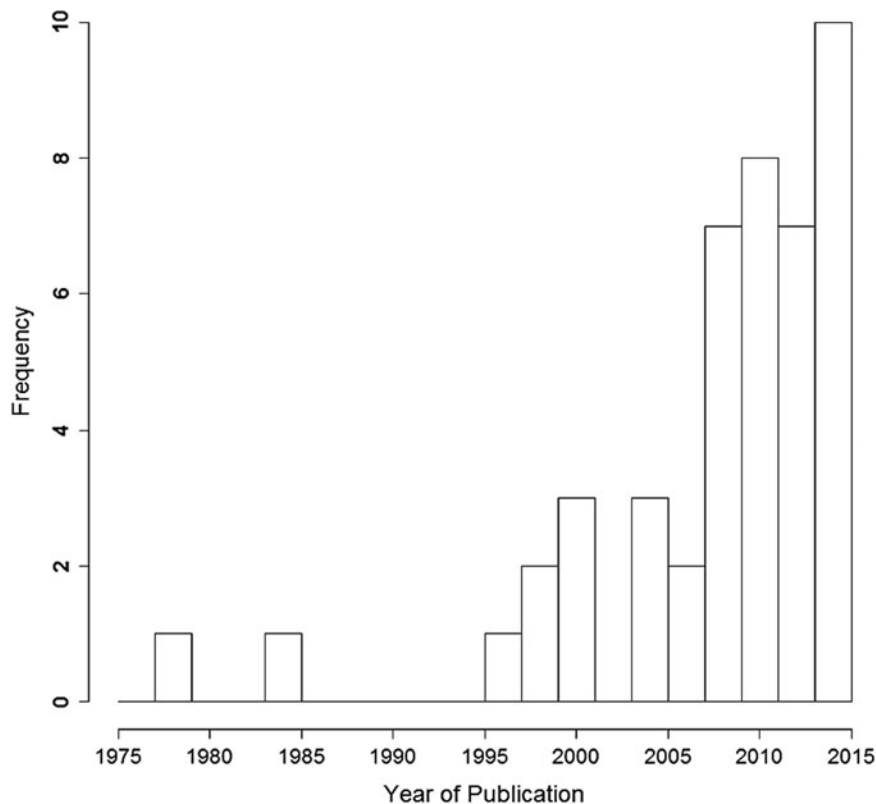

**SUPPLEMENTARY FIG. S1.** Annual frequency of studies in our review

### Data Search Strategies

Search strategy for PubMed

(((((((((((((antibiotic resistan\*) OR antimicrobial resistan\*) OR drug resistan\*) AND *Escherichia coli*) OR *E. coli*) OR Enterobacteria\*) AND human\*) AND livestock) OR food animal\*) OR pig\*) OR swine) OR poultry) OR bovine\*) OR cattle) OR cow\*)

Search strategy for Web of Science and SCOPUS

(antibiotic resistan\*) OR (antimicrobial resistan\*) OR (drug resistan\*) AND (*Escherichia coli*) OR (*E. coli*) OR (Enterobacteria\*) AND (human\*) AND (livestock) OR (food animal\*) OR (pig\*) OR (swine) OR (poultry) OR (bovine) OR (cattle) OR (cow\*)

Search strategy for EMBASE

1. antibiotic resistance/exp
2. antibiotic resistance/exp
3. drug resistance/exp
4. *Escherichia coli*/exp
5. Enterobacteria/exp
6. human/exp
7. livestock/exp
8. food animal/exp
9. pig/exp
10. swine/exp
11. poultry/exp

12. bovine/exp
13. cattle/exp
14. cow/exp
- 15 1 or 2 or 3
17. 4 or 5
18. 7 or 8 or 9 or 10 or 11 or 12 or 13 or 14
19. 6 and 15 and 17 and 18

### References

- Al-Ghamdi MS, El-Morsy F, *et al.* Antibiotic resistance of *Escherichia coli* isolated from poultry workers, patients and chicken in the eastern province of Saudi Arabia. *Trop Med Int Health* 1999;4:278–283.
- Ciccozzi M, Giufre M, *et al.* Phylogenetic analysis of multidrug-resistant *Escherichia coli* clones isolated from humans and poultry. *New Microbiol* 2013;36:385–394.
- Dahms C, Hubner NO, *et al.* Occurrence of ESBL-Producing *Escherichia coli* in Livestock and Farm Workers in Mecklenburg-Western Pomerania, Germany. *PLoS One* 2015;10:e0143326.
- de Been M, Lanza VF, *et al.* Dissemination of Cephalosporin Resistance Genes between *Escherichia coli* Strains from Farm Animals and Humans by Specific Plasmid Lineages. *PLoS Genet* 2014;10:e1004776.
- Deng Y, Zeng Z, *et al.* Dissemination of IncFII plasmids carrying *rmtB* and *qepA* in *Escherichia coli* from pigs, farm

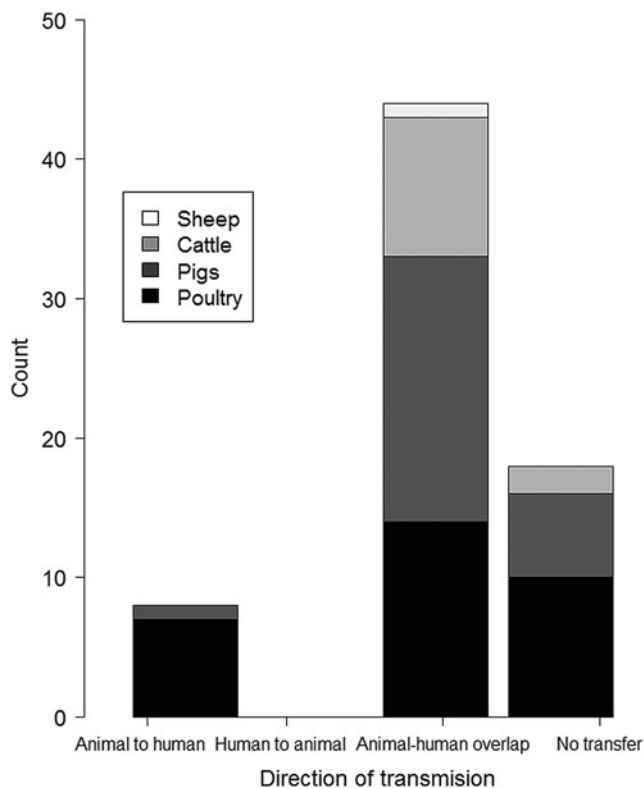

**SUPPLEMENTARY FIG. S2.** Counts of food animal species reported.

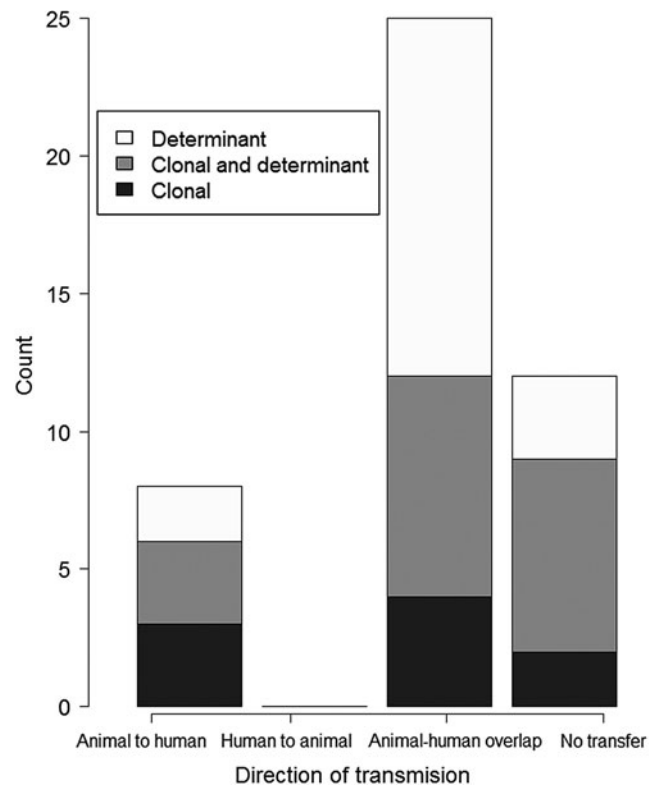

**SUPPLEMENTARY FIG. S4.** Nature of transfer.

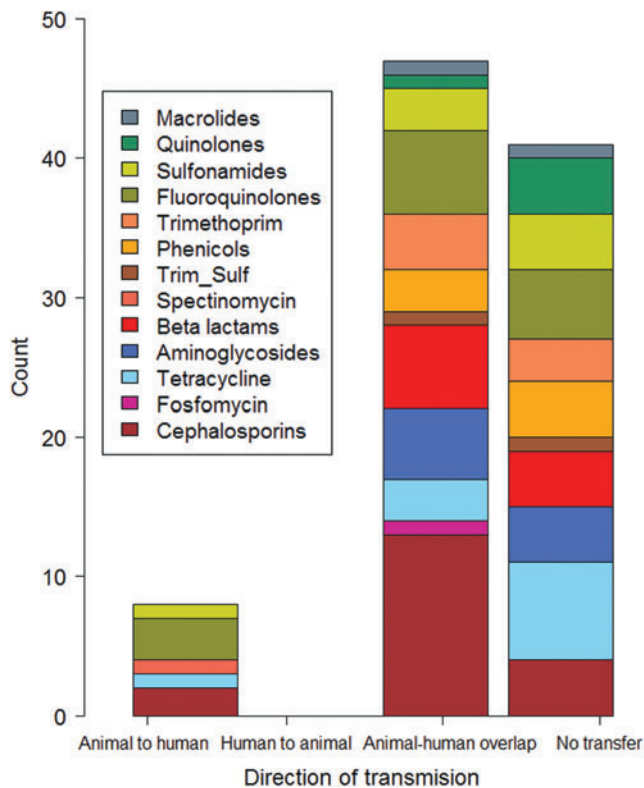

**SUPPLEMENTARY FIG. S3.** Counts of antibiotics reported. Note that some studies reported more than one antibiotic. (\*Trim\_Sulf = Trimethoprim/Sulfamethoxazole)

workers and the environment. Clin Microbiol Infect 2011;17:1740–1745.

Dohmen W, Bonten MJM, *et al.* Carriage of extended-spectrum beta-lactamases in pig farmers is associated with occurrence in pigs. Clin Microbiol Infect 2015;21:917–923.

Giufre M, Graziani C, *et al.* *Escherichia coli* of human and avian origin: Detection of clonal groups associated with fluoroquinolone and multidrug resistance in Italy. J Antimicrob Chemother 2012;67:860–867.

Hammerum AM, Larsen J, *et al.* Characterization of extended-spectrum [beta]-lactamase (ESBL)-producing *Escherichia coli* obtained from Danish pigs, pig farmers and their families from farms with high or no consumption of third- or fourth-generation cephalosporins. J Antimicrob Chemother 2014;69:2650–2657.

Hammerum AM, Sandvag D, *et al.* Detection of sul1, sul2 and sul3 in sulphonamide resistant *Escherichia coli* isolates obtained from healthy humans, pork and pigs in Denmark. Int J Food Microbiol 2006;106:235–237

Ho PL, Wong RC, *et al.* Distribution of integron-associated trimethoprim-sulfamethoxazole resistance determinants among *Escherichia coli* from humans and food-producing animals. Lett Appl Microbiol 2009;49:627–634.

Ho P-L, Wong RC, *et al.* Genetic identity of aminoglycoside-resistance genes in *Escherichia coli* isolates from human and animal sources. J Med Microbiol 2010;59:702–707.

Hu YY, Cai JC, *et al.* Molecular typing of CTX-M-Producing *Escherichia coli* isolates from environmental water, swine feces, specimens from healthy humans, and human patients. Appl Environ Microbiol 2013;79:5988–5996.

Huijbers PMC, van Hoek AHAM, *et al.* Methicillin-resistant *Staphylococcus aureus* and extended-spectrum and AmpC beta-lactamase-producing *Escherichia coli* in broilers and in people living and/or working on organic broiler farms. Vet Microbiol 2015;176:120–125.

- Jakobsen L, Bortolaia V, *et al.* Limited similarity between plasmids encoding CTX-M-1 beta-lactamase in *Escherichia coli* from humans, pigs, cattle, organic poultry layers and horses in Denmark. *J Global Antimicrob Resist* 2015;3:132–136.
- Jakobsen L, Garneau P, *et al.* Microarray-based detection of extended virulence and antimicrobial resistance gene profiles in phylogroup B2 *Escherichia coli* of human, meat and animal origin. *J Med Microbiol* 2011;60:1502–1511.
- Jakobsen L, Kurbasic A, *et al.* *Escherichia coli* isolates from broiler chicken meat, broiler chickens, pork, and pigs share phylogroups and antimicrobial resistance with community-dwelling humans and patients with urinary tract infection. *Foodborne Pathogens Dis* 2010;7:537–547.
- Johnson JR, Kuskowski MA, *et al.* Similarity between human and chicken *Escherichia coli* isolates in relation to ciprofloxacin resistance status. *J Infect Dis* 2006;194:71–78.
- Johnson TJ, Logue CM, *et al.* Associations between multidrug resistance, plasmid content, and virulence potential among extraintestinal pathogenic and commensal *Escherichia coli* from humans and poultry. *Foodborne Pathogens Dis* 2012;9:37–46.
- Jorgensen ST. Relatedness of chloramphenicol resistance plasmids in epidemiologically unrelated strains of pathogenic *Escherichia coli* from man and animals. *J Med Microbiol* 1983;16:165–173.
- Kariuki S, Gilks CF, *et al.* Plasmid diversity of multi-drug-resistant *Escherichia coli* isolated from children with diarrhoea in a poultry-farming area in Kenya. *Ann Trop Med Parasitol* 1997;91:87–94.
- Leverstein-van Hall MA, Dierikx CM, *et al.* Dutch patients, retail chicken meat and poultry share the same ESBL genes, plasmids and strains. *Clin Microbiol Infect* 2011;17:873–880.
- Levy SB. Emergence of antibiotic-resistant bacteria in the intestinal flora of farm inhabitants. *J Infect Dis* 1978;137:689–690.
- Maynard C, Bekal S, *et al.* Heterogeneity among virulence and antimicrobial resistance gene profiles of extraintestinal *Escherichia coli* isolates of animal and human origin. *J Clin Microbiol* 2004;42:5444–5452.
- Oppegaard H, Steinum TM, *et al.* Horizontal transfer of a multi-drug resistance plasmid between coliform bacteria of human and bovine origin in a farm environment. *Appl Environ Microbiol* 2001;67:3732–3734.
- Riccobono E, Pallecchi L, *et al.* Carriage of antibiotic-resistant *Escherichia coli* among healthy children and home-raised chickens: A household study in a resource-limited setting. *Microb Drug Resist* 2012;18:83–87.
- Smet A, Martel A, *et al.* Comparative analysis of extended-spectrum- $\beta$ -lactamase-carrying plasmids from different members of Enterobacteriaceae isolated from poultry, pigs and humans: Evidence for a shared  $\beta$ -lactam resistance gene pool? *J Antimicrob Chemother* 2009;63:1286–1288.
- Stokes MO, Cottell JL, *et al.* Detection and characterization of pCT-like plasmid vectors for bla(CTX-M-14) in *Escherichia coli* isolates from humans, turkeys and cattle in England and Wales. *J Antimicrob Chemother* 2012;67:1639–1644.
- Tseng S-P, Wang S-F, *et al.* Characterization of Fosfomycin Resistant Extended-Spectrum beta-Lactamase-Producing *Escherichia coli* Isolates from Human and Pig in Taiwan. *PLoS One* 2015;10:e0135864.
- Valentin L, Sharp H, *et al.* Subgrouping of ESBL-producing *Escherichia coli* from animal and human sources: An approach to quantify the distribution of ESBL types between different reservoirs. *Int J Med Microbiol* 2014;304:805–816.
- van den Bogaard AE, London N, *et al.* Antibiotic resistance of faecal *Escherichia coli* in poultry, poultry farmers and poultry slaughterers. *J Antimicrob Chemother* 2001;47:763–771.
- Vieira AR, Collignon P, *et al.* Association Between Antimicrobial Resistance in *Escherichia coli* Isolates from Food Animals and Blood Stream Isolates from Humans in Europe: An Ecological Study. *Foodborne Pathogens Dis* 2011;8:1295–1301.
- Winokur PL, Vonstein DL, *et al.* Evidence for transfer of CMY-2 AmpC beta-lactamase plasmids between *Escherichia coli* and Salmonella isolates from food animals and humans. *Antimicrob Agents Chemother* 2001;45:2716–2722.
- Xia L-N, Li L, *et al.* A Survey of Plasmid-Mediated Fluoroquinolone Resistance Genes from *Escherichia coli* Isolates and Their Dissemination in Shandong, China. *Foodborne Pathogens Dis* 2010;7:207–215.
- Zhang XY, Ding LJ, *et al.* Occurrence and characteristics of class 1 and class 2 integrons in resistant *Escherichia coli* isolates from animals and farm workers in northeastern China. *Microb Drug Resist* 2009;15:323–328.
- Zhao J, Chen Z, *et al.* Prevalence and Dissemination of oqxAB in *Escherichia coli* Isolates from Animals, Farmworkers, and the Environment. *Antimicrob Agents Chemother* 2010;54:4219–4224.

SUPPLEMENTARY TABLE S1. SUMMARY OF 45 INCLUDED STUDIES

| Author, Year of publication      | Sample origin and collection date    | Source and No. of animal isolates                 | Source and No. of human isolates | Matching             | Study type       | Antibiotics reported                                                                                                                                        | Methods used                                                                                                                                            | Direction stated     | Nature of evidence             | Nature of transfer     | Evidence for nature of transfer                                                                                      |
|----------------------------------|--------------------------------------|---------------------------------------------------|----------------------------------|----------------------|------------------|-------------------------------------------------------------------------------------------------------------------------------------------------------------|---------------------------------------------------------------------------------------------------------------------------------------------------------|----------------------|--------------------------------|------------------------|----------------------------------------------------------------------------------------------------------------------|
| Al-Ghamdi <i>et al.</i> , 1999   | Saudi Arabia, 1999                   | Poultry, 119                                      | Clinical, 100<br>Healthy, 117    | No matching          | Active           | Beta lactams,<br>Chloramphenicol,<br>Gentamicin,<br>Spectinomycin,<br>Tetracycline,<br>Nitrofurantoin,<br>Trimethoprim/<br>sulfamethoxazole,<br>Ceftazidime | AST and Serotyping                                                                                                                                      | Animal to human      | Low resolution typing          | Clonal                 | Overlapping serotypes<br>High spectinomycin resistance in humans and poultry isolates despite limited use in humans  |
| Ueda, 2015                       | Vietnam, 2013                        | Poultry, 47                                       | Healthy, 199                     | Spatial and temporal | Active           | Cephalosporins                                                                                                                                              | AST, PCR for gene detection, MLST for genotypic relatedness and replicon typing for plasmid characterization                                            | No transfer          | Intermediate resolution typing | Clonal and determinant | Distinct clonal, ARGs, and plasmid profiles                                                                          |
| Jakobsen <i>et al.</i> , 2015    | Denmark, 2006–2010                   | Cattle, 4<br>Poultry, 3<br>Pigs, 21<br>Horses, 15 | Clinical, 22                     | Spatial and temporal | Active           | Cephalosporins                                                                                                                                              | PFGE for genotypic relatedness and PCR-based replicon typing and pMLST and restriction fragment length polymorphism (RFLP) for plasmid characterization | No transfer          | Intermediate resolution typing | Clonal and determinant | Distinct clonal and plasmid profiles                                                                                 |
| Tseng <i>et al.</i> , 2015       | Taiwan, 2013                         | Pigs, 22                                          | Clinical, 123                    | Spatial and temporal | Active           | Cephalosporins,<br>Fosfomycin                                                                                                                               | AST, PFGE, and MLST for genotypic isolate relatedness, PCR for gene characterization and plasmid characterization                                       | Animal-human overlap | Intermediate resolution typing | Determinant            | Distinct clonal profiles                                                                                             |
| Lupindu, 2015                    | Tanzania, 2012                       | Cattle, 50<br>Soil, 21<br>Water, 7                | Healthy, 40                      | Spatial and temporal | Active           | Beta lactams,<br>Tetracycline                                                                                                                               | AST and PFGE for isolate genotypic relatedness                                                                                                          | Animal-human overlap | Low resolution typing          | Clonal                 | Overlapping clonal profiles                                                                                          |
| Huijbers <i>et al.</i> , 2015    | Netherlands, 2011–2012               | Poultry, 70                                       | Healthy, 27                      | Spatial and temporal | Active           | Cephalosporins                                                                                                                                              | AST, MLST for isolate genotypic typing and PCR for gene characterization                                                                                | Animal-human overlap | Intermediate resolution typing | Determinant            | Overlapping ARG profiles                                                                                             |
| Valentin <i>et al.</i> , 2014    | Germany, 2011–2014                   | Cattle, 120<br>Poultry, 49<br>Pigs, 139           | Clinical, 422<br>Healthy, 213    | No matching          | Active           | Cephalosporins                                                                                                                                              | AST, PCR for gene and isolate genotypic characterization                                                                                                | Animal-human overlap | Intermediate resolution typing | Clonal and determinant | Overlapping clonal and ARG profiles                                                                                  |
| Hammerum <i>et al.</i> , 2014    | Denmark, 2010–2011                   | Pigs, 339                                         | Healthy, 195                     | Spatial and temporal | Active           | Cephalosporins                                                                                                                                              | AST, PCR for gene detection, PFGE, and MLST for isolate genotypic typing, and PBRT for plasmid replicon typing                                          | Animal-human overlap | Intermediate resolution typing | Clonal and determinant | Overlapping clonal and ARG profiles                                                                                  |
| Hu <i>et al.</i> , 2013          | China, 2012–2013 & archived isolates | Pigs, 31<br>Water, 26                             | Clinical, 36<br>Healthy, 46      | No matching          | Active & Passive | Cephalosporins                                                                                                                                              | AST, PCR for gene detection, PFGE, and MLST for isolate genotypic typing                                                                                | Animal-human overlap | Intermediate resolution typing | Clonal and determinant | Overlapping clonal and ARG profiles                                                                                  |
| Ciccocioppo <i>et al.</i> , 2013 | Italy, 2009–2010                     | Poultry, 43                                       | Clinical, 129                    | No matching          | Passive          | Beta lactams,<br>Trimethoprim/<br>sulfamethoxazole,<br>Gentamicin,<br>Cephalosporins<br>Ciprofloxacin                                                       | AST, phylogenetic analysis of MLST sequence type sequences                                                                                              | Animal-human overlap | Intermediate resolution typing | Clonal                 | Overlapping clonal profiles                                                                                          |
| Dierikx, 2013                    | Netherlands, 2009                    | Poultry, 26                                       | Healthy, 18                      | Temporal             | Active           | Cephalosporins                                                                                                                                              | AST, Microarray analysis and PCR for gene characterization, MLST for isolate genotypic typing and RFLP for plasmid typing                               | Animal to human      | Intermediate resolution typing | Determinant            | High prevalence of resistance in poultry isolates compared to human isolates<br>Overlapping ARG and plasmid profiles |

(continued)

SUPPLEMENTARY TABLE S1. (CONTINUED)

| Author, Year of publication   | Sample origin and collection date     | Source and No. of animal isolates  | Source and No. of human isolates | Matching             | Study type | Antibiotics reported                                                                                                            | Methods used                                                                                                         | Direction stated     | Nature of evidence             | Nature of transfer     | Evidence for nature of transfer                                             |
|-------------------------------|---------------------------------------|------------------------------------|----------------------------------|----------------------|------------|---------------------------------------------------------------------------------------------------------------------------------|----------------------------------------------------------------------------------------------------------------------|----------------------|--------------------------------|------------------------|-----------------------------------------------------------------------------|
| Stokes, <i>et al.</i> , 2012  | United Kingdom, 2006–2010             | Cattle, 33 Poultry, 9 Sheep, 2     | Clinical, 26                     | No matching          | Passive    | Cephalosporins                                                                                                                  | PFGE and DNA arrays for isolate typing, and RFLP for plasmid characterization                                        | Animal-human overlap | Intermediate resolution typing | Determinant            | Overlapping plasmid profiles                                                |
| Johnson, <i>et al.</i> , 2012 | USA, Netherlands and Japan, 1990–2005 | Broilers and Poultry, 1331         | Patients, 629 Healthy, 252       | No matching          | Passive    | Sulfonamides, Tetracyclines, Macrolides, Beta lactams, Chloramphenicol, Ciprofloxacin, Gentamicin, Quinolones, Fluoroquinolones | AST, PCR for ARGs and virulence genes characterization, and PRBT for plasmid typing                                  | No transfer          | Intermediate resolution typing | Clonal and determinant | Distinct clonal, ARG and plasmid profiles                                   |
| Deng <i>et al.</i> , 2011     | China, 2002                           | Pigs, 24 Environment, 5            | Healthy, 12                      | Spatial and temporal | Passive    |                                                                                                                                 | AST, PCR for ARGs characterization, PFGE and MLST for isolate genotypic typing, and PBRT for plasmid replicon typing | Animal-human overlap | Intermediate resolution typing | Clonal and determinant | Overlapping clonal, ARG, and plasmid profiles                               |
| Zhao <i>et al.</i> , 2010     | China, 2002                           | Poultry, 25 Pigs, 73               | Healthy, 33                      | Spatial and temporal | Active     | Quinolones, Ciprofloxacin                                                                                                       | AST, PCR for ARGs characterization, PFGE and MLST for isolate genotypic typing, and RFLP for plasmid typing          | Animal-human overlap | Intermediate resolution typing | Clonal and determinant | Overlapping clonal and ARG profiles                                         |
| Schwaiger, 2010               | Germany, 2002–2004                    | Pigs, 137                          | Patients, 152                    | No matching          | Active     | Tetracyclines, Sulfonamides, Streptomycin                                                                                       | AST, PCR for ARGs characterization                                                                                   | No transfer          | Intermediate resolution typing | Determinant            | Distinct ARG profiles                                                       |
| Moodley, 2009                 | Denmark, 2007                         | Pigs, 70 Environment, 35           | Healthy, 5                       | Spatial and temporal | Active     | Cephalosporins                                                                                                                  | AST, PCR for ARGs characterization, PFGE for isolate genotypic typing and RFLP for plasmid typing                    | Animal-human overlap | Intermediate resolution typing | Determinant            | Overlapping plasmid profiles                                                |
| Mulvey, 2009                  | Canada, 1999–2000                     | Cattle, 51                         | Patients, 25                     | Temporal             | Passive    | Cephalosporins                                                                                                                  | AST, PCR for ARGs characterization, PFGE for isolate genotypic typing and plasmid typing                             | Animal-human overlap | Intermediate resolution typing | Determinant            | Overlapping plasmid profiles                                                |
| Ho <i>et al.</i> , 2009       | China, 2002–2004                      | Cattle, 11 Poultry, 25 Pigs, 28    | Patients, 51 Healthy, 59         | No matching          | Passive    | Trimethoprim-Sulfamethoxazole                                                                                                   | AST, PCR for ARGs and integron characterization, and PFGE for isolate genotypic typing                               | Animal-human overlap | Intermediate resolution typing | Determinant            | Overlapping integron and ARG profiles                                       |
| Graziani, 2009                | Italy, 2006                           | Poultry, 113                       | Healthy, 125                     | No matching          | Passive    | Ciprofloxacin                                                                                                                   | AST, PCR, and PFGE for isolate genotypic and virulence gene typing                                                   | No transfer          | Intermediate resolution typing | Clonal                 | Distinct clonal profiles                                                    |
| Hammerum <i>et al.</i> , 2006 | Denmark, 2002–2003                    | Pigs, 610 Pork, 189                | Healthy, 199                     | No matching          | Active     | Sulfonamides                                                                                                                    | AST, PCR for ARGs characterization                                                                                   | Animal to human      | Intermediate resolution typing | Determinant            | Overlapping ARGs in animal and human isolates                               |
| Johnson <i>et al.</i> , 2006  | Spain, 1996–1998                      | Poultry, 49                        | Healthy, 68                      | Spatial and temporal | Passive    | Ciprofloxacin                                                                                                                   | AST, PCR, and PFGE for genotypic and virulence gene typing                                                           | Animal to human      | Intermediate resolution typing | Clonal                 | High prevalence of resistance in animal isolates compared to human isolates |
| Maynard <i>et al.</i> , 2004  | Canada, 2001                          | Pigs, poultry, cattle and pets, 39 | Patients, 70                     | No matching          | Active     | Beta lactams, Aminoglycosides, Tetracycline, Phenicol, Trimethoprim, Sulfonamides                                               | AST, PCR, and colony hybridization for ARGs characterization and distribution                                        | No transfer          | Intermediate resolution typing | Clonal and determinant | High similarity in resistant animal and human isolates                      |
|                               |                                       |                                    |                                  |                      |            |                                                                                                                                 |                                                                                                                      |                      |                                |                        | Distinct clonal profiles                                                    |

(continued)

SUPPLEMENTARY TABLE S1. (CONTINUED)

| Author, Year of publication              | Sample origin and collection date | Source and No. of animal isolates             | Source and No. of human isolates | Matching             | Study type | Antibiotics reported                                                                                                  | Methods used                                                                                                       | Direction stated     | Nature of evidence             | Nature of transfer     | Evidence for nature of transfer                                                                                                        |
|------------------------------------------|-----------------------------------|-----------------------------------------------|----------------------------------|----------------------|------------|-----------------------------------------------------------------------------------------------------------------------|--------------------------------------------------------------------------------------------------------------------|----------------------|--------------------------------|------------------------|----------------------------------------------------------------------------------------------------------------------------------------|
| Kang, 2005                               | South Korea, 2001–2003            | Poultry, 163 Pigs, 133                        | Patients, 201 Healthy, 167       | Temporal             | Active     | Trimethoprim, Aminoglycosides, Sulfonamides                                                                           | AST, bPCR for integron characterization, PFGE for genotypic typing, and plasmid typing                             | No transfer          | Intermediate resolution typing | Clonal and determinant | Distinct clonal and plasmid profiles                                                                                                   |
| Oppesgaard <i>et al.</i> , 2001          | Norway, 1996                      | Cattle, 13                                    | Healthy, 7                       | Spatial and temporal | Active     | Beta lactams, Tetracycline, Sulfonamides, Streptomycin, Trimethoprim                                                  | AST, PCR for integron characterization, plasmid typing                                                             | Animal-human overlap | Intermediate resolution typing | Determinant            | Overlapping plasmid profiles                                                                                                           |
| van den Bogaard <i>et al.</i> , 2001     | Netherlands, 2001                 | Poultry, 122                                  | Healthy, 216                     | Spatial and temporal | Active     | Ciprofloxacin                                                                                                         | AST, PFGE for isolate genotypic typing                                                                             | Animal to human      | Low resolution typing          | Clonal                 | High prevalence of resistance in animal isolates compared to human isolates<br>Overlapping clonal profiles<br>Distinct clonal profiles |
| Kariuki, 1999                            | Kenya, 1994                       | Poultry, 248                                  | Healthy, 128                     | Spatial and temporal | Active     | Beta lactams, Aminoglycosides, Tetracycline, Chloramphenicol, Trimethoprim, Ciprofloxacin, Quinolones, Cephalosporins | AST, PFGE for isolate genotypic typing, and plasmid typing                                                         | No transfer          | Low resolution typing          | Clonal                 | Distinct clonal profiles                                                                                                               |
| Leverstein-van Hall <i>et al.</i> , 2011 | Netherlands, 2006–2010            | Poultry, 35 Poultry meat, 81                  | Patients, 409                    | No matching          | Passive    | Cephalosporins                                                                                                        | AST, microarray analysis for ARGs characterization, MLST for isolate genotypic typing, and PBRT for plasmid typing | Animal to human      | Intermediate resolution typing | Clonal and determinant | Overlapping clonal, ARG, and plasmid profiles                                                                                          |
| Jakobsen <i>et al.</i> , 2011            | Denmark, 2004                     | Poultry, 17 Pigs, 8 Pork, 30 Broiler meat, 18 | Patients, 52 Healthy, 36         | Spatial and temporal | Active     | Beta lactams, Chloramphenicol, Trimethoprim, Ciprofloxacin, Quinolones, Macrolides                                    | Microarray analysis for ARGs and virulence genes characterization                                                  | Animal-human overlap | Intermediate resolution typing | Clonal and determinant | Overlapping clonal and ARG profiles                                                                                                    |
| Vieira <i>et al.</i> , 2011              | Europe, 2005–2008                 | Poultry, 4000 Pigs, 4500 Cattle, 3500         | Patients, 100,000                | Temporal             | Passive    | Beta lactams, Ciprofloxacin, Aminoglycosides, Cephalosporins                                                          | AST                                                                                                                | Animal-human overlap | Co-occurrence                  | Clonal                 | Significant correlations between human and animal isolates                                                                             |
| Ho <i>et al.</i> , 2010                  | China, 2002–2004                  | Cattle, 11 Poultry, 37 Pigs, 33 Fish, 1       | Patients, 167                    | No matching          | Active     | Aminoglycosides                                                                                                       | AST, PCR for ARGs characterization, PCR and PFGE for isolate genotypic typing, and PBRT for plasmid typing         | Animal-human overlap | Intermediate resolution typing | Determinant            | Overlapping ARG and plasmid profiles                                                                                                   |
| Xia <i>et al.</i> , 2010                 | China, 2007                       | Poultry, 198 Pigs, 137                        | Patients, 139 Healthy, 18        | Spatial and temporal | Active     | Fluoroquinolones                                                                                                      | AST, PCR for ARGs characterization, PCR and PFGE for isolate genotypic typing                                      | No transfer          | Intermediate resolution typing | Clonal and determinant | Distinct clonal patterns                                                                                                               |
| Dohmen <i>et al.</i> , 2015              | Netherlands, 2011                 | Pigs, 160                                     | Healthy, 13                      | Spatial and temporal | Active     | Cephalosporins                                                                                                        | AST, PCR for ARGs characterization, PCR and MLST for isolate genotypic typing, and PBRT for plasmid typing         | Animal-human overlap | Intermediate resolution typing | Clonal and determinant | Overlapping clonal, ARG, and plasmid profiles                                                                                          |
| Kariuki, <i>et al.</i> , 1997            | Kenya, 1993–1994                  | Poultry, 246                                  | Patients, 168                    | Spatial and temporal | Active     | Beta lactams, Tetracycline, Chloramphenicol, Cephalosporins, Ciprofloxacin, Quinolones,                               | AST and restriction endonuclease digestion (RED) for plasmid typing                                                | No transfer          | Low resolution typing          | Determinant            | Distinct clonal patterns                                                                                                               |

(continued)

SUPPLEMENTARY TABLE S1. (CONTINUED)

| Author, Year of publication    | Sample origin and collection date | Source and No. of animal isolates              | Source and No. of human isolates | Matching             | Study type | Antibiotics reported                                                                                                                               | Methods used                                                                                                       | Direction studied       | Nature of evidence             | Nature of transfer     | Evidence for nature of transfer                                                                                                 |
|--------------------------------|-----------------------------------|------------------------------------------------|----------------------------------|----------------------|------------|----------------------------------------------------------------------------------------------------------------------------------------------------|--------------------------------------------------------------------------------------------------------------------|-------------------------|--------------------------------|------------------------|---------------------------------------------------------------------------------------------------------------------------------|
| Phongpaichit, 2007             | Thailand, 2004–2005               | Figs. 432                                      | Healthy, 185                     | Spatial and temporal | Active     | Beta lactams, Aminoglycosides, Tetracycline, Chloramphenicol, Cephalosporins, Trimethoprim-Sulfamethoxazole, Ciprofloxacin, Quinolones, Macrolides | AST and PCR for ARGs and integron characterization                                                                 | No transfer             | Intermediate resolution typing | Determinant            | Distinct integron patterns                                                                                                      |
| Riccobono <i>et al.</i> , 2012 | Bolivia, 2002–2005                | Poultry, 36                                    | Healthy, 30                      | Spatial and temporal | Active     | Tetracyclines, Quinolones                                                                                                                          | AST and PCR for ARGs characterization and genotypic typing                                                         | No transfer             | Intermediate resolution typing | Clonal and determinant | Distinct clonal and plasmid profiles                                                                                            |
| Zhang <i>et al.</i> , 2009     | China, 2004–2007                  | Poultry, 106<br>Pigs, 172                      | Healthy, 23                      | Spatial and temporal | Active     | Aminoglycosides, Trimethoprim, Sulfonamides                                                                                                        | AST and PCR for ARGs characterization                                                                              | Animal-human overlap    | Intermediate resolution typing | Determinant            | Overlapping ARG and integron profiles                                                                                           |
| Levy, 1978                     | USA 1974                          | Poultry, 320                                   | Healthy, 337                     | Spatial and temporal | Active     | Tetracyclines                                                                                                                                      | AST                                                                                                                | Animal to human overlap | Low resolution typing          | Clonal and determinant | Overlapping clonal profiles                                                                                                     |
| de Been <i>et al.</i> , 2014   | Netherlands, 2006–2011            | Poultry, 4<br>Poultry meat, 7<br>Fig. 4        | Healthy, patients, 17            | No matching          | Passive    | Cephalosporins                                                                                                                                     | AST, MLST, and WGS for genotypic typing, and phylogenetics for relatedness analysis                                | Animal - human overlap  | High resolution typing         | Determinant            | Increase in antibiotic-resistance in humans in contact with both tetracycline-fed chicken and oxytetracycline supplemented feed |
| Jorgensen, 1983                | Denmark, Britain 1960–1981        | Figs. 19                                       | Patients, 13                     | No matching          | Passive    | Cephalosporins                                                                                                                                     | AST and hybridization techniques for plasmid analysis                                                              | Animal-human overlap    | Low resolution typing          | Clonal and determinant | Overlapping plasmid profiles                                                                                                    |
| Dahms <i>et al.</i> , 2015     | Germany, 2012                     | Cattle, 10<br>Pig, 33<br>Poultry, 13           | Healthy, 5                       | Spatial and temporal | Active     | Beta lactam, Chloramphenicol, Ciprofloxacin, Streptomycin, Sulfamethoxazole, Tetracycline, Trimethoprim                                            | AST, PCR for ARGs characterization, MLST for isolate genotypic typing                                              | Animal-human overlap    | Intermediate resolution typing | Clonal                 | Overlapping clonal and ARG profiles                                                                                             |
| Jakobsen <i>et al.</i> , 2010  | Denmark, 2004–2006                | Broiler meat, 283<br>Pork, 187<br>Poultry, 138 | Patients, 102<br>Healthy, 109    | Spatial and temporal | Active     | Ciprofloxacin                                                                                                                                      | AST, PCR for genotypic typing                                                                                      | Animal to human         | Intermediate resolution typing | Clonal and determinant | Overlapping clonal profiles                                                                                                     |
| Giufre <i>et al.</i> , 2012    | Italy, 2009                       | Poultry, 101                                   | Patients, 277                    | Temporal             | Passive    | Chloramphenicol                                                                                                                                    | AST, PCR for ARGs characterization, PCR and MLST for isolate genotypic typing                                      | Animal-human overlap    | Intermediate resolution typing | Determinant            | Overlapping clonal profiles                                                                                                     |
| Winokur <i>et al.</i> , 2001   | USA, 1998–2000                    | Cattle & pigs, 377                             | Patients, 1017                   | Temporal             | Active     | Beta lactams                                                                                                                                       | AST, isoelectric focus analysis for ARGs characterization, PFGE for genotypic typing and RFLP for plasmid analysis | Animal-human overlap    | Intermediate resolution typing | Determinant            | Overlapping plasmid and ARG profiles                                                                                            |
| Smet <i>et al.</i> , 2009      | Belgium, 2001–2007                | Poultry, 4<br>Pigs, 2                          | Healthy, 3                       | No matching          | Active     | Cephalosporins                                                                                                                                     | AST, PCR, and isoelectric focus analysis for ARGs characterization, and PBRT and RFLP for plasmid analysis         | Animal-human overlap    | Intermediate resolution typing | Determinant            | Overlapping plasmid and ARG profiles                                                                                            |

AST, antibiotic susceptibility testing; PCR, polymerase chain reaction; ARGs, antibiotic resistance genes; MLST, multilocus sequence typing; PFGE, pulsed-field gel electrophoresis; RFLP, restricted fragment length polymorphism; pMLST plasmid multilocus sequence typing; PBRT, PCR-based replicon typing.
